# Supplementary material for: W–Nb–O oxides with tunable acid properties as efficient catalysts for the transformation of biomass-derived oxygenates in aqueous systems
Source: Royal Society of Chemistry journal article supplement (doi:10.1039/c9cy00367c), 2019-01-01
Supplement: c9cy00367c1.pdf [file c9cy00367c1.pdf]

## Electronic Supplementary Information

### **W-Nb-O oxides with tunable acid properties as efficient catalysts for the transformation of biomass-derived oxygenates in aqueous systems**

Daniel Delgado,<sup>a</sup> Alberto Fernández-Arroyo,<sup>a</sup> Marcelo E. Domine,<sup>\*a</sup> Ester García-González<sup>b</sup>, José M. López Nieto<sup>\*a</sup>

<sup>a)</sup> Instituto de Tecnología Química, Universitat Politècnica de València-Consejo Superior de Investigaciones Científicas, Avenida de los Naranjos s/n, 46022 Valencia, Spain.

E-mail: [jmlopez@itq.upv.es](mailto:jmlopez@itq.upv.es), [mdomine@itq.upv.es](mailto:mdomine@itq.upv.es)

<sup>b)</sup> Departamento de Química Inorgánica, Facultad de Ciencias Químicas, Universidad Complutense, 28040 Madrid, Spain.

## Content

### Experimental part.

**Figure S1.** Examples of chromatograms analyzed at 0 h (A) and 5 h (B) of reaction.

**Figure S2.** N<sub>2</sub>-adsorption-desorption isotherms of W-Nb-O catalysts; a) WNb-0; b) WNb-0.29; c) WNb-0.40; d) WNb-0.53; e) WNb-0.62; f) WNb-0.80; g) WNb-0.95; h) WNb-1.

**Figure S3.** BJH pore size distribution of W-Nb-O catalysts: a) WNb-0; b) WNb-0.29; c) WNb-0.40; d) WNb-0.53; e) WNb-0.62; f) WNb-0.80; g) WNb-0.95; h) WNb-1.

**Table S1.** Catalytic results of W-Nb-O oxides in the aerobic transformation of glycerol.

**Table S2.** Catalytic results of W-Nb-O mixed oxides catalysts in the valorization of the aqueous model mixture at 200 °C.

**Figure S4.** A) FTIR spectra of adsorbed pyridine: a) WNb-0; b) WNb-0.29; c) WNb-0.40; d) WNb-0.53; e) WNb-0.62; f) WNb-0.80; g) WNb-0.95; h) WNb-1. B) Amount of adsorbed ammonia per gram of catalysts as a function of Nb-content. C) Amount of adsorbed ammonia per surface area of catalyst as a function of Nb-content.

**Figure S5.** Selectivity to acrolein (A), heavy compounds (HC's) (B) and carbon oxides (C) as a function of reaction temperature during the aerobic transformation of glycerol. Complete conversion of glycerol is achieved in all cases. Reaction conditions: glycerol/H<sub>2</sub>O/O<sub>2</sub>/He molar ratio of 2/40/4/54, Contact time, W/F, of 81 g<sub>cat</sub> h (mol<sub>gly</sub>)<sup>-1</sup>.

**Figure S6.** Reaction network (Self-aldol condensation of propanal to 2-methyl-2-pentenal, Esterification of acetic acid and ethanol to ethyl acetate and Summarized reaction network).

**Figure S7.** Aqueous model mixture before (A) and after (B) reaction using WNb-0.62 catalyst: Reaction conditions: 7h at 180 °C (P<sub>N2</sub>=13 bar).

**Table S3.** Catalytic results of W-Nb-O oxides during propanal self-aldol condensation in the presence and absence of water.

**Table S4.** Reuse of catalysts on the transformation of oxygenated compounds present in aqueous model mixtures.

**Table S5.** Metal loss of catalysts after first catalytic use.

**Figure S8.** Main products and total organic yields (wt%) for different catalysts in the condensation of an aqueous mixture of oxygenated compounds after 1 h of reaction.

**Table S6.** Catalytic activity in the conversion of oxygenated compounds in aqueous model mixture of WNbO catalysts at 200 °C.

**Table S7:** Total organic yield and normalized total organic yield values for different WNb-O samples in the condensation of propanal in aqueous phase.

## **Experimental part**

### **Catalytic tests for condensation reaction**

Based on the aqueous model mixture composition, a theoretical maximum total organic yield can be calculated, assuming that: a) 100% conversion for all reactants is achieved, b) acetic acid can be equally converted to ethyl acetate and acetone) and c) final products are C<sub>9</sub> compounds (no intermediate or heavier products are present in the final mixture). In this ideal scenario, the calculated composition of the final mixture is: 51.3 wt% of water, 19.1 wt% of ethyl acetate, and 29.6 wt% of C<sub>9</sub> products. Therefore, results of catalytic experiments expressed in terms of Total organic yield (TOY) and yield to the main reaction products are calculated by considering that  $\approx 30$  wt% is the maximum value attainable. In this way, Total organic products yield (TOY) measured during reaction = 20.0 wt%; Maximum total organic products yield attainable (theoretical) = 30.0 wt%; Calculated total organic products yield (referred to the maximum) = 66.7%.

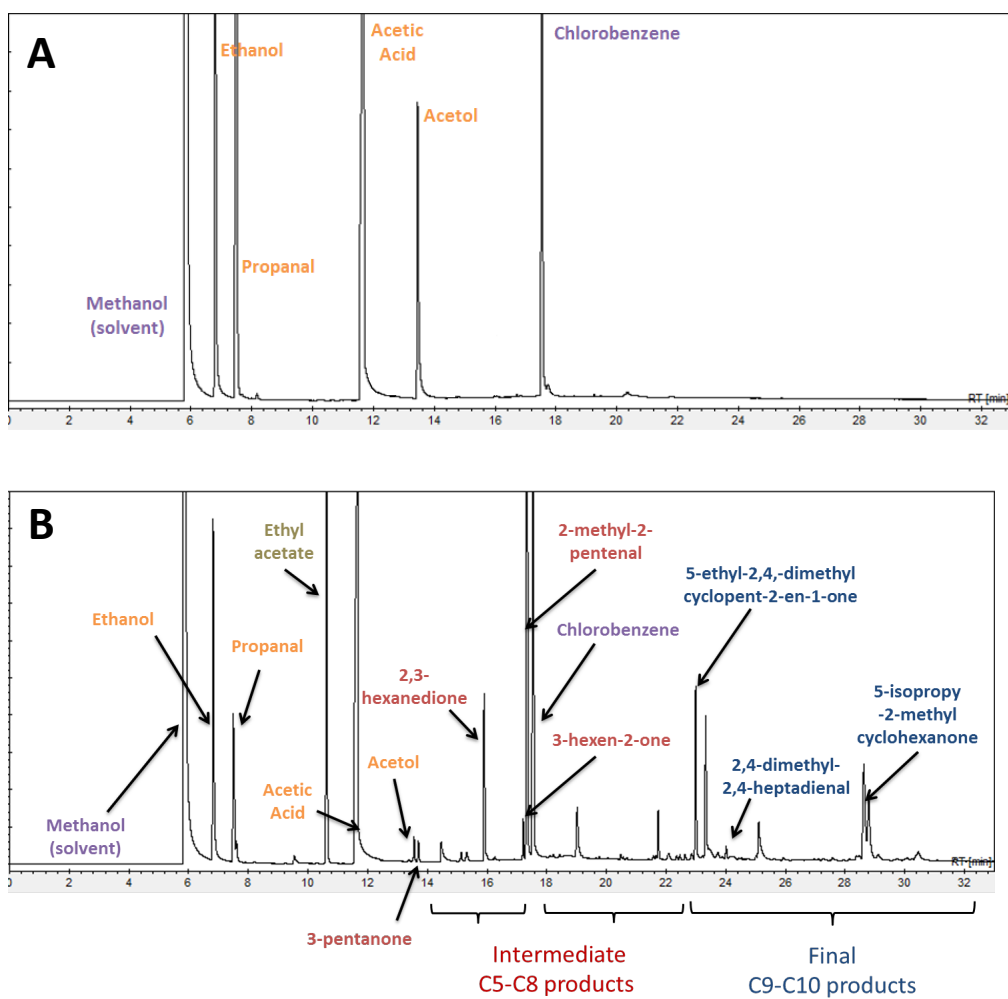

**Figure S1.** Examples of chromatograms analyzed at 0 h (A) and 5 h (B) of reaction.

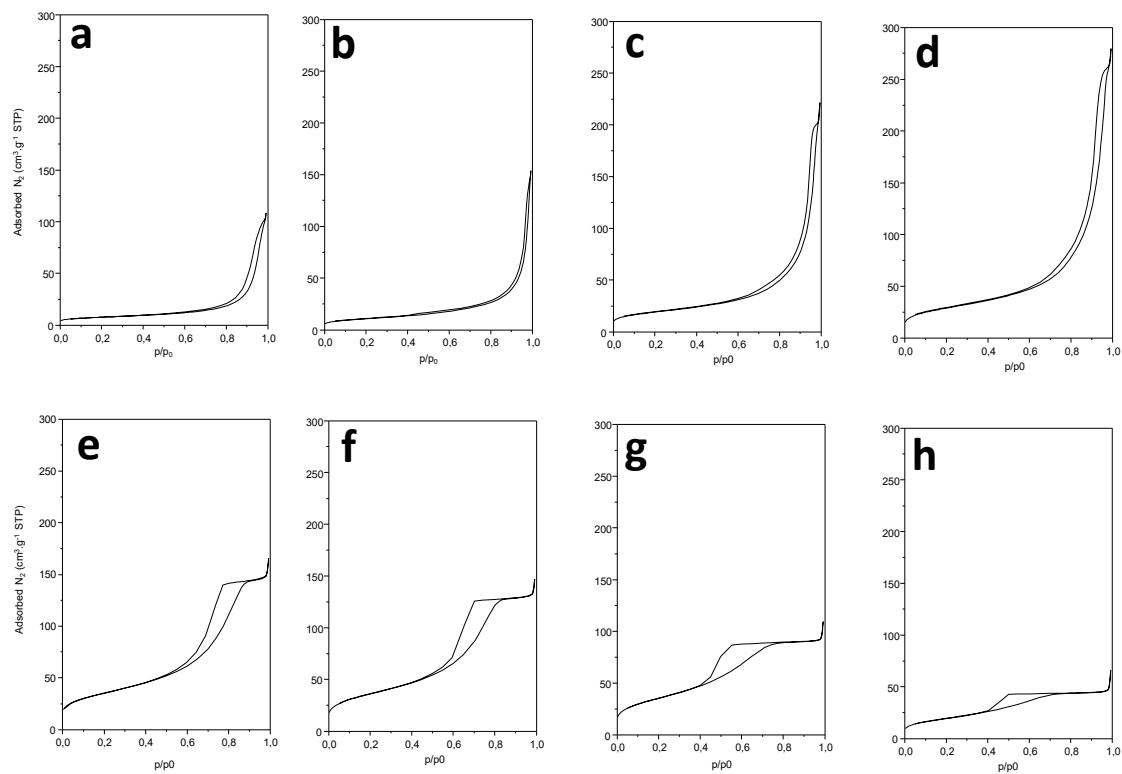

**Figure S2.** N<sub>2</sub>-adsorption-desorption isotherms of W-Nb-O catalysts: a) WNb-0; b) WNb-0.29; c) WNb-0.40; d) WNb-0.53; e) WNb-0.62; f) WNb-0.80; g) WNb-0.95; h) WNb-1.

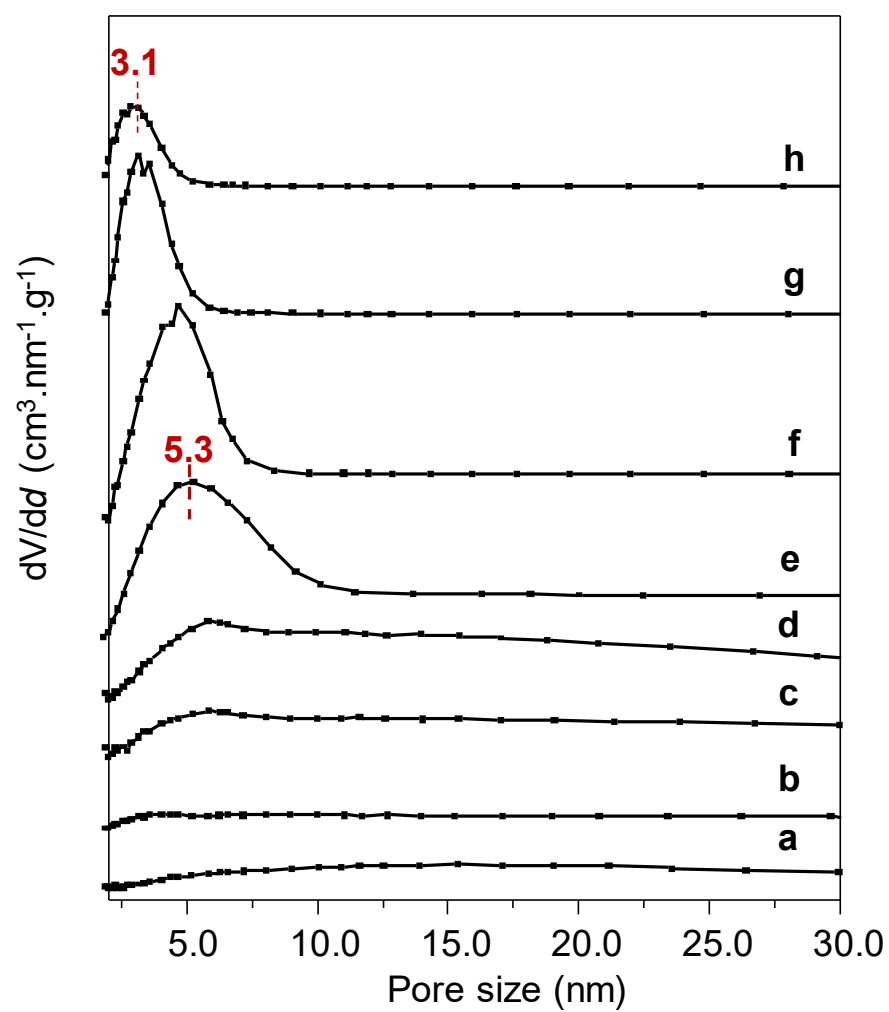

**Figure S3.** BJH pore size distribution of W-Nb-O catalysts: a) WNb-0; b) WNb-0.29; c) WNb-0.40; d) WNb-0.53; e) WNb-0.62; f) WNb-0.80; g) WNb-0.95; h) WNb-1.

**Table S1.** Catalytic properties of W-Nb-O oxides in the aerobic transformation of glycerol.

| Catalyst | Glycerol conversion (%) | Yield (%) |                 |                              |                     |
|----------|-------------------------|-----------|-----------------|------------------------------|---------------------|
|          |                         | Acrolein  | CO <sub>x</sub> | Heavy compounds <sup>a</sup> | Others <sup>b</sup> |
| WNb-0    | 100.0                   | 82.2      | 8.9             | 4.4                          | 4.1                 |
| WNb-0.29 | 99.9                    | 83.5      | 7.8             | 6.1                          | 2.8                 |
| WNb-0.53 | 99.7                    | 67.6      | 11.2            | 15.8                         | 5.5                 |
| WNb-0.80 | 99.7                    | 62.6      | 11.0            | 22.4                         | 4.0                 |
| WNb-1    | 100.0                   | 45.3      | 15.7            | 35.8                         | 3.2                 |

<sup>a</sup>. Considered as compounds that are not eluted into the gas chromatograph. <sup>b</sup>. Small amounts of acetaldehyde, acetic acid and acrylic acid. Reaction conditions: 295 °C, glycerol/oxygen ratio of 2/4.

**Table S2.** Catalytic results of W-Nb-O mixed oxides catalysts in the valorization of the aqueous model mixture at 200 °C.<sup>a</sup>

| Sample   | Total organic yield (%) | Conversion (%) |          |         |             | Yield (%)                      |                                 |                   |               | Carbon balance (%) |
|----------|-------------------------|----------------|----------|---------|-------------|--------------------------------|---------------------------------|-------------------|---------------|--------------------|
|          |                         | Acetol         | Propanal | Ethanol | Acetic acid | C <sub>5</sub> -C <sub>8</sub> | C <sub>9</sub> -C <sub>10</sub> | 2M2P <sup>b</sup> | ethyl acetate |                    |
| WNb-0    | 52.9                    | 100            | 86.6     | 49.8    | 0.0         | 12.4                           | 11.2                            | 29.3              | 22.3          | 90.9               |
| WNb-0.29 | 56.6                    | 100            | 85.1     | 50.8    | 8.2         | 13.4                           | 10.7                            | 32.5              | 19.0          | 87.2               |
| WNb-0.40 | 59.3                    | 100            | 94.1     | 47.1    | 8.0         | 13.9                           | 16.0                            | 29.4              | 23.6          | 87.8               |
| WNb-0.53 | 64.2                    | 100            | 93.8     | 56.7    | 8.0         | 13.5                           | 18.0                            | 32.7              | 19.4          | 90.8               |
| WNb-0.62 | 64.5                    | 100            | 90.0     | 51.3    | 9.8         | 11.2                           | 17.7                            | 35.6              | 19.2          | 94.0               |
| WNb-0.80 | 63.9                    | 100            | 91.0     | 52.8    | 10.1        | 9.5                            | 19.0                            | 35.4              | 20.5          | 94.5               |
| WNb-0.95 | 63.5                    | 100            | 94.6     | 52.1    | 4.3         | 10.4                           | 19.0                            | 34.1              | 19.4          | 94.0               |
| WNb-1    | 65.2                    | 100            | 92.0     | 51.9    | 6.5         | 10.5                           | 19.2                            | 35.5              | 20.2          | 95.0               |

<sup>a</sup> Reaction conditions: aqueous model mixture (3.0 g) and catalyst (0.15 g) in autoclave-type reactor, at 13 bar (under N<sub>2</sub>) and 200°C under continuous stirring during 7 h.

<sup>b</sup> 2M2P = 2-methyl-2-pentenal.



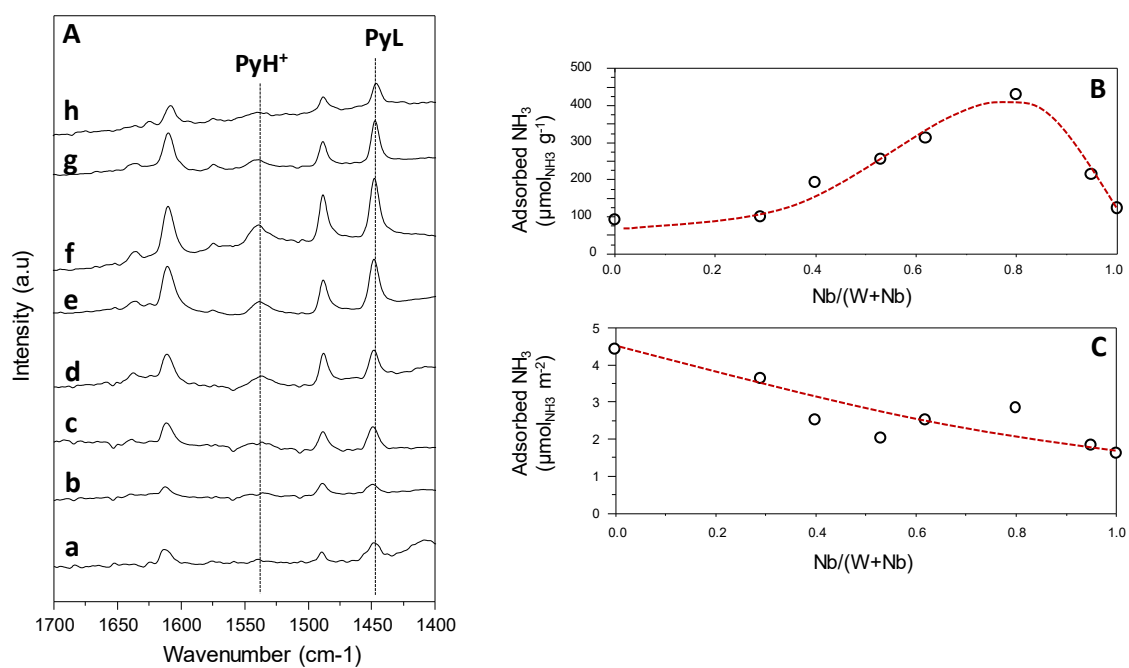

**Figure S4.** A) FTIR spectra of adsorbed pyridine: a) WNb-0; b) WNb-0.29; c) WNb-0.40; d) WNb-0.53; e) WNb-0.62; f) WNb-0.80; g) WNb-0.95; h) WNb-1. B) Amount of adsorbed ammonia per gram of catalysts as a function of Nb-content. C) Amount of adsorbed ammonia per surface area of catalyst as a function of Nb-content.

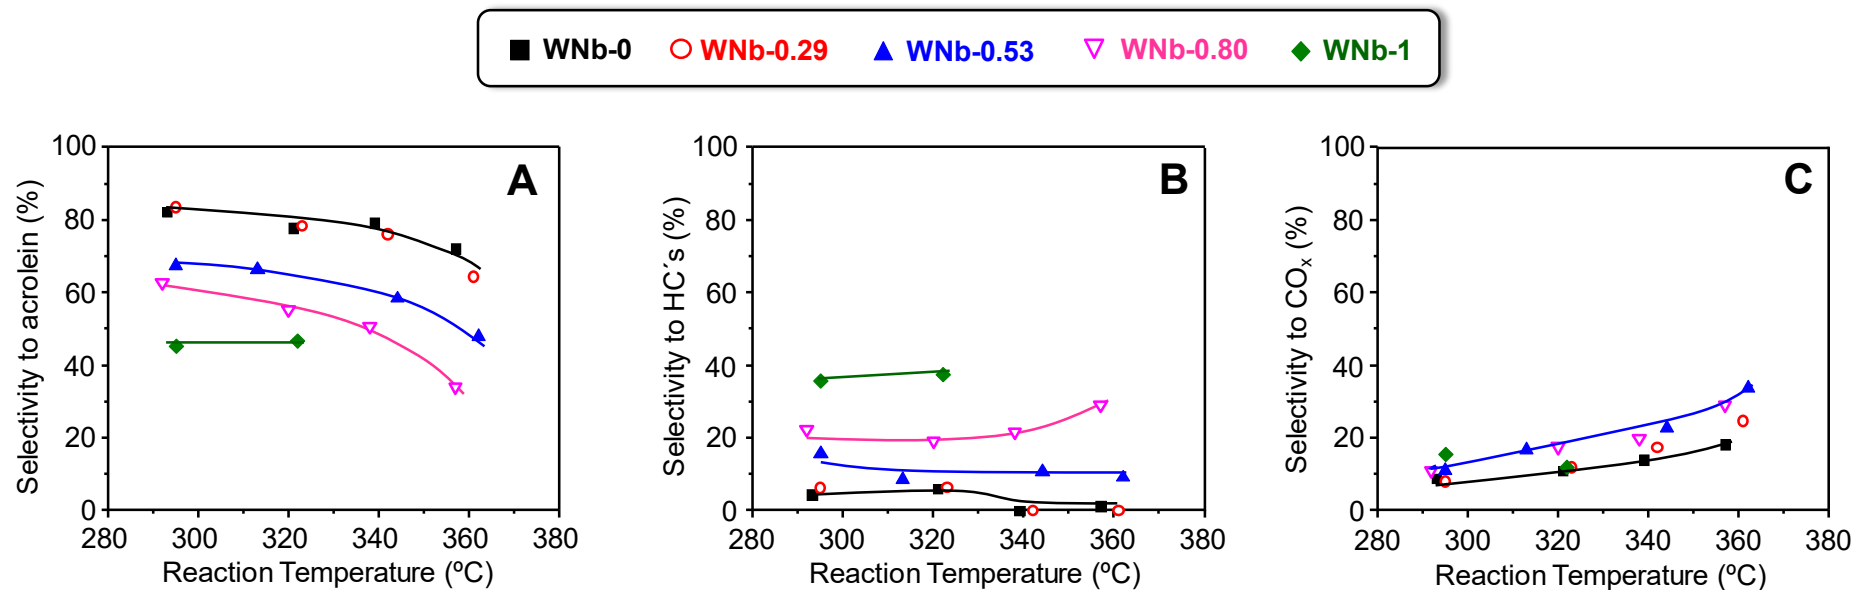

**Figure S5.** Selectivity to acrolein (A), heavy compounds (HC's) (B) and carbon oxides (C) as a function of reaction temperature during the aerobic transformation of glycerol. Complete conversion of glycerol is achieved in all cases. Reaction conditions: glycerol/H<sub>2</sub>O/O<sub>2</sub>/He molar ratio of 2/40/4/54, Contact time, W/F, of 81 g<sub>cat</sub> h (mol<sub>gly</sub>)<sup>-1</sup>.

**A**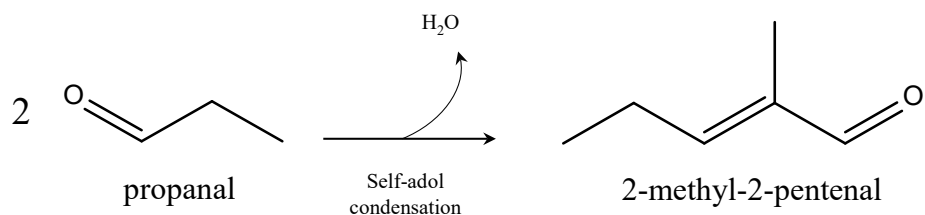**B**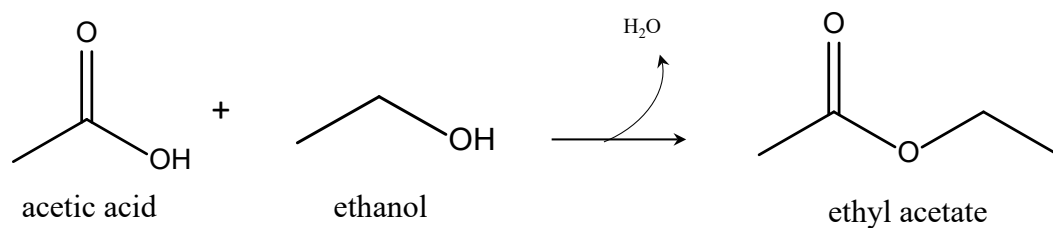**C**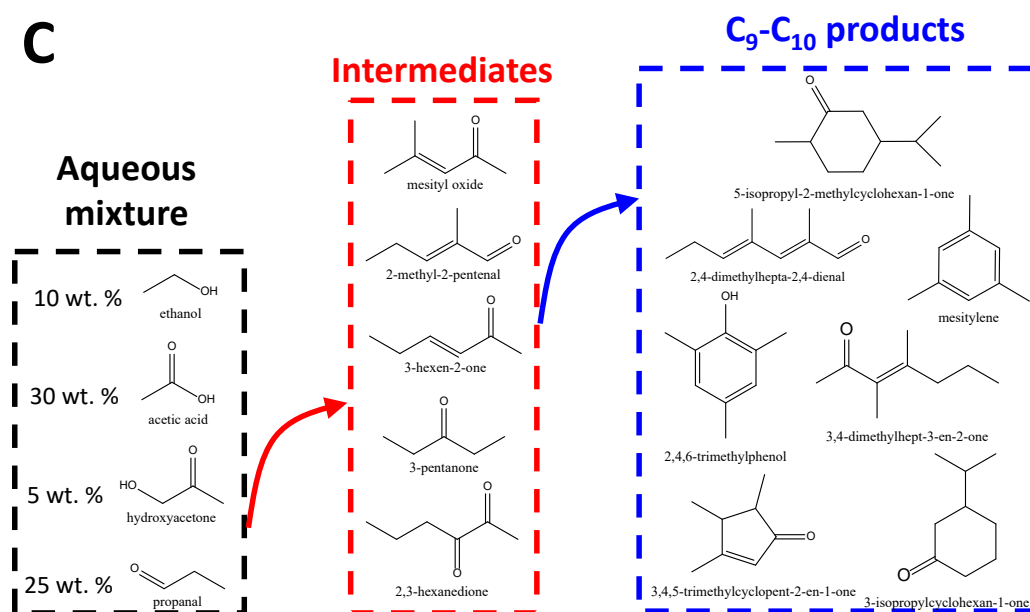

**Figure S6.** Reaction network: A) Self-aldol condensation of propanal to 2-methyl-2-pentenal; B) Esterification of acetic acid and ethanol to ethyl acetate; C) Summarized reaction network.

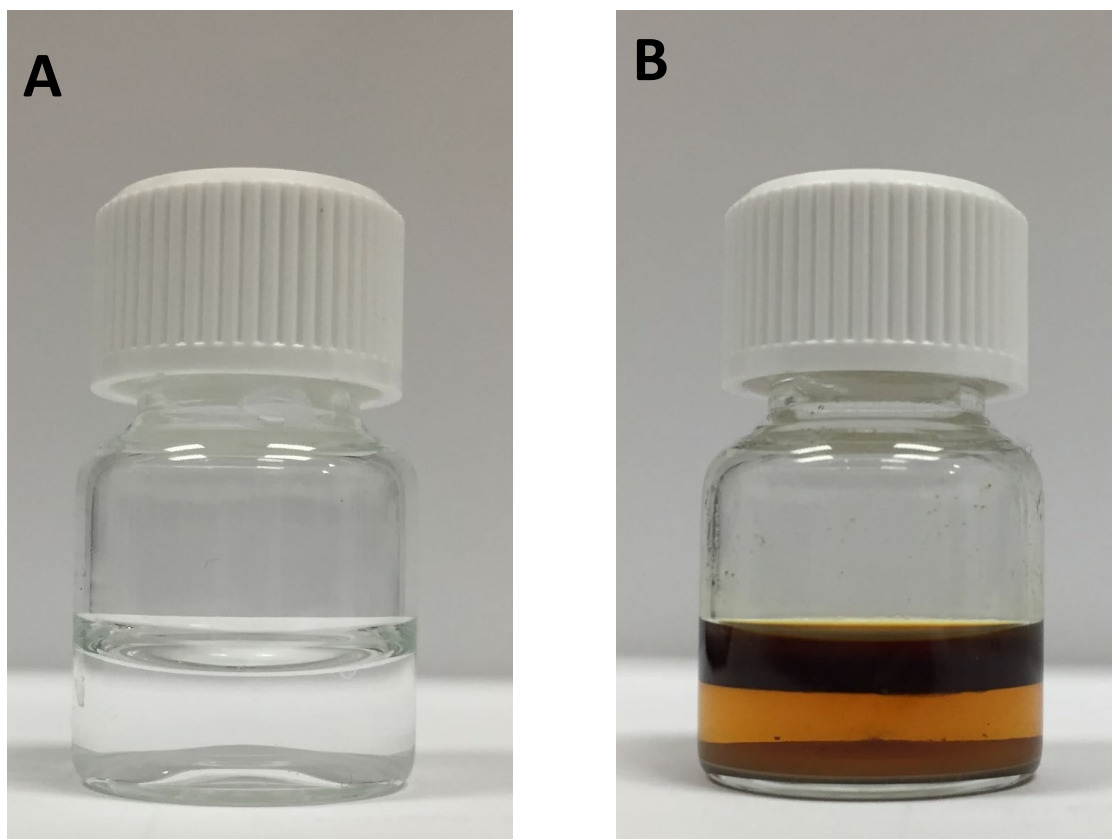

**Figure S7.** Aqueous model mixture before (A) and after (B) reaction using WNb-0.62 catalyst: Reaction conditions: 7h at 180 °C ( $P_{N_2}$ =13 bar).

**Table S3:** Catalytic results of W-Nb-O oxides during propanal self-aldol condensation at lower contact time.<sup>a</sup>

| <b>Catalyst</b> | <b>Propanal Conversion</b> | <b>Total Organic Product Yield</b> |
|-----------------|----------------------------|------------------------------------|
|                 | <b>(%)</b>                 | <b>(%)</b>                         |
| WNb-0           | 38.7                       | 20.0                               |
| WNb-0.29        | 42.2                       | 26.0                               |
| WNb-0.62        | 59.6                       | 59.0                               |
| WNb-1           | 39.7                       | 29.0                               |

<sup>a</sup> Reaction Conditions: Initial mixture (3.00 g), with a Propanal/Ethanol/H<sub>2</sub>O wt% ratio of 25/45/30; weight of catalyst = 0.05 g. In autoclave-type reactor, at 13 bar N<sub>2</sub> and 200 °C under continuous stirring; time on stream = 1 h.

**Table S4.** Reuse of catalysts on the transformation of oxygenated compounds present in aqueous model mixtures.<sup>a</sup>

| Catalyst | Reuse cycles <sup>b</sup> | Total Organic Yield (%) | Conversion (%) |          |         |             | Products Yield (%)             |                                 |                   |               | Carbon balance (%) |
|----------|---------------------------|-------------------------|----------------|----------|---------|-------------|--------------------------------|---------------------------------|-------------------|---------------|--------------------|
|          |                           |                         | Acetol         | Propanal | Ethanol | Acetic Acid | C <sub>5</sub> -C <sub>8</sub> | C <sub>9</sub> -C <sub>10</sub> | 2M2P <sup>c</sup> | Ethyl acetate |                    |
| WNb-0.62 | 0                         | 64.5                    | 100            | 90.0     | 51.3    | 9.8         | 11.2                           | 17.7                            | 35.6              | 19.2          | 94                 |
|          | 1                         | 61.7                    | 100            | 87.1     | 51.1    | 7.6         | 10.2                           | 18.2                            | 33.3              | 20.5          | 95                 |
|          | 2                         | 60.3                    | 100            | 86.4     | 51.3    | 4.9         | 9.6                            | 17.9                            | 32.8              | 20.1          | 93                 |
| WNb-1    | 0                         | 65.2                    | 100            | 92.0     | 51.9    | 6.5         | 10.5                           | 19.2                            | 35.5              | 20.2          | 95                 |
|          | 1                         | 64.3                    | 100            | 92.8     | 45.6    | 5.9         | 11.0                           | 16.3                            | 37.0              | 22.7          | 97                 |
|          | 2                         | 64.3                    | 100            | 90.9     | 45.4    | 6.3         | 12.0                           | 15.7                            | 36.6              | 22.3          | 96                 |

<sup>a</sup> Reaction Conditions: For each use, aqueous model mixture (3.00 g) and catalyst (0.15 g) in autoclave-type reactor, at 13 bar N<sub>2</sub> and 200°C under continuous stirring; time on stream = 7 h.

<sup>b</sup> Reuse cycles; R0 = 1<sup>st</sup> use; R1 = 2<sup>nd</sup> use; R2 = 3<sup>rd</sup> use.

<sup>c</sup> 2M2P = 2-methyl-2-pentenal.

**Table S5.** Metal loss of catalysts after first catalytic use.

| <b>Sample</b>                                      | <b>Metal Loss after first use (wt%) <sup>a</sup></b> |
|----------------------------------------------------|------------------------------------------------------|
| Ce <sub>0.5</sub> Zr <sub>0.5</sub> O <sub>2</sub> | 30.0                                                 |
| WNb-0.62                                           | Not detected.                                        |
| WNb-1                                              | Not detected                                         |

<sup>a</sup> determined by ICP measurements of reaction liquids

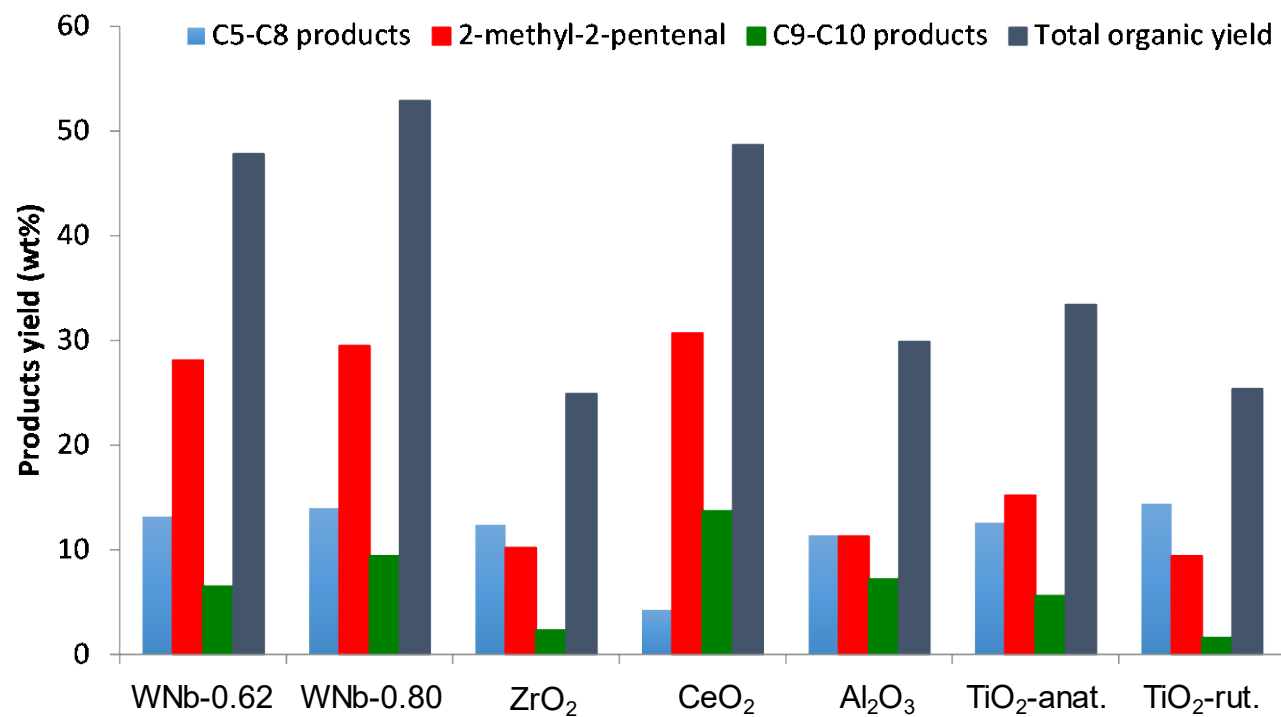

**Figure S8:** Main products and total organic yields (wt%) for different catalysts in the condensation of an aqueous mixture of oxygenated compounds after 1 h of reaction at 200 °C.



**Table S6.** Catalytic activity in the conversion of oxygenated compounds in aqueous model mixture of WNbO catalysts at 200 °C.<sup>a</sup>

| Catalyst        | Total Organic Yield (%) | Conversion (%) |          |         |             | Products Yield (%) |             |                   | Reaction Rate (mmol/min·g) <sup>e</sup> |
|-----------------|-------------------------|----------------|----------|---------|-------------|--------------------|-------------|-------------------|-----------------------------------------|
|                 |                         | Acetol         | Propanal | Ethanol | Acetic Acid | C5-C8              | C9-C10+     | 2M2P <sup>d</sup> |                                         |
| WNb-0.00        | 46.6 <sup>b</sup>       | 100.0          | 77.2     | 47.5    | 5.9         | 13.9               | 6.3         | 26.4              | 1467                                    |
| WNb-0.29        | 46.5 <sup>b</sup>       | 100.0          | 74.9     | 48.8    | 6.5         | 16.9               | 5.5         | 24.1              | 1589                                    |
| WNb-0.40        | 50.6 <sup>b</sup>       | 100.0          | 82.8     | 49.1    | 6.8         | 15.1               | 7.8         | 27.7              | 1763                                    |
| WNb-0.53        | 50.2 <sup>c</sup>       | 100.0          | 80.4     | 51.2    | 4.0         | 18.5               | 5.8         | 25.9              | 1816                                    |
| <b>WNb-0.62</b> | <b>52.3<sup>c</sup></b> | 100.0          | 82.1     | 48.3    | 4.8         | 13.0               | <b>10.7</b> | 28.6              | <b>1854</b>                             |
| <b>WNb-0.80</b> | <b>52.9<sup>c</sup></b> | 100.0          | 79.0     | 39.5    | 12.6        | 14.0               | <b>9.4</b>  | 29.5              | <b>1882</b>                             |
| WNb-0.95        | 51.4 <sup>c</sup>       | 100.0          | 68.8     | 52.2    | 11.4        | 11.3               | 8.6         | 31.5              | 1757                                    |
| WNb-1.00        | 51.0 <sup>c</sup>       | 100.0          | 71.2     | 42.6    | 11.4        | 14.0               | 8.7         | 28.3              | 1577                                    |

<sup>a</sup> Reaction Conditions: aqueous model mixture (3.00 g) and catalyst (0.15 g) in autoclave-type reactor, at 13 bar N<sub>2</sub> and 200 °C under continuous stirring; <sup>b</sup> time on stream = 3 h; <sup>c</sup> time on stream = 1 h; <sup>d</sup> 2M2P = 2-methyl-2-pentenal; <sup>e</sup> Calculated as the mmol of products formed per minute and gram of catalyst at time on stream = 1 h.

**Table S7:** Total organic yield and normalized total organic yield values for different WNb-O samples in the condensation of propanal in aqueous phase.

| Catalysts | Total Organic Yield (%) | Surface density of acid sites (mmol/m <sup>2</sup> ) | Normalized Total Organic Yield (%) <sup>a</sup> |
|-----------|-------------------------|------------------------------------------------------|-------------------------------------------------|
| WNb-0.00  | 20                      | 0.98                                                 | 20.4                                            |
| WNb-0.29  | 26                      | 0.78                                                 | 33.3                                            |
| WNb-0.62  | 59                      | 0.70                                                 | 84.3                                            |
| WNb-1.00  | 29                      | 0.54                                                 | 53.4                                            |

<sup>a</sup> Total organic yield (%) / Surface density of acid sites (mmol/m<sup>2</sup>).
